# Supplementary material for: Comparative RNA-seq analysis of transcriptome dynamics during petal development in Rosa chinensis
Source: PubMed Central journal article supplement (PMC5320579; doi:10.1038/srep43382), 2017-02-22
Supplement: srep43382-s1.pdf [file srep43382-s1.pdf]

**Title**

Comparative RNA-seq analysis of transcriptome dynamics during petal development in *Rosa chinensis*

**Author list**

Yu Han<sup>1</sup>, Huihua Wan<sup>1</sup>, Tangren Cheng<sup>1</sup>, Jia Wang<sup>1</sup>, Weiru Yang<sup>1</sup>, Huitang Pan<sup>1\*</sup> & Qixiang Zhang<sup>1\*</sup>

**Supplementary Information**

Supplementary Figure S1. Calibration curve of Cy-3,5-diglucoside in HPLC standards.

Supplementary Figure S2. Distribution of transcript read lengths.

Supplementary Figure S3. Pearson correlation between two biological replicates in the four developmental stage samples.

Supplementary Figure S4. Species from which the transcript annotation was derived in the Nr database.

Supplementary Figure S5. GO enrichment analysis of up- and down-regulated differentially expressed genes in FB\_CP vs. FB\_GP, FB\_PP vs. FB\_CP and OF\_PP vs. FB\_PP.

Supplementary Figure S6. qPCR validation of transcript levels evaluated by RNA-seq.

Supplementary Table S1. The quality analysis of all reads from eight samples.

Supplementary Table S2. Length frequency distribution of assembly transcripts and unigenes.

Supplementary Table S3. Length distribution of assembly transcripts and unigenes.

Supplementary Table S4. Success rate statistics of transcript annotation using seven databases.

Supplementary Table S5. GO annotation classification frequencies.

Supplementary Table S6. KOG annotation classification frequencies.

Supplementary Table S7. KO annotation classification frequencies.

Supplementary Table S8. Number of total clean reads of the eight samples mapped to reference sequences.

Supplementary Table S9. FPKM (fragments per kilobase of transcript per million base pairs sequenced) of the four developmental stage samples (FB\_GP, FB\_CP, FB\_PP, OF\_PP).

Supplementary Table S10. Up- and down-regulated DEGs in the transcriptome comparisons of FB\_CP vs. FB\_GP, FB\_PP vs. FB\_CP, and OF\_PP vs. FB\_PP.

Supplementary Table S11. Differentially expressed genes of the anthocyanin and petal expansion regulatory pathways.

Supplementary Table S12. Differentially expressed genes of the phytohormone biosynthesis and signalling pathways.

Supplementary Table S13. Transcription factors with  $\geq$  five-fold change in expression during rose petal development.

Supplementary Table S14. Upper and lower primer sequences of genes for qPCR experiments.

Supplementary Figure S1. Calibration curve of Cy-3,5-diglucoside in HPLC standards.

$Y$  (content) =  $4.96 \times 10^7 \times X$  (area) -  $7.98 \times 10^4$ ,  $R^2 = 0.999727$ , Standard error =  $1.603642 \times 10^5$

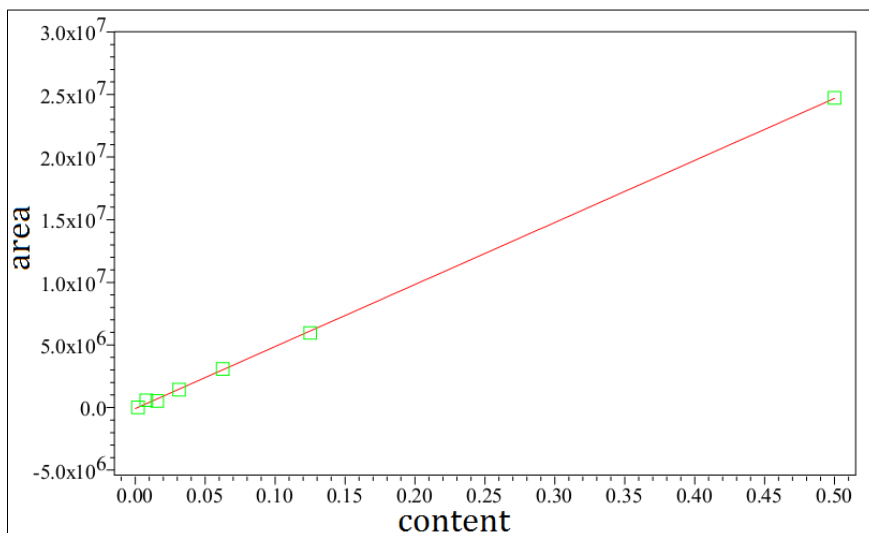

Supplementary Figure S2. Distribution of transcript read lengths in eight samples. The x-axis denotes the distance from the 5' end of transcript (%), while the y-axis shows the average distribution of reads.

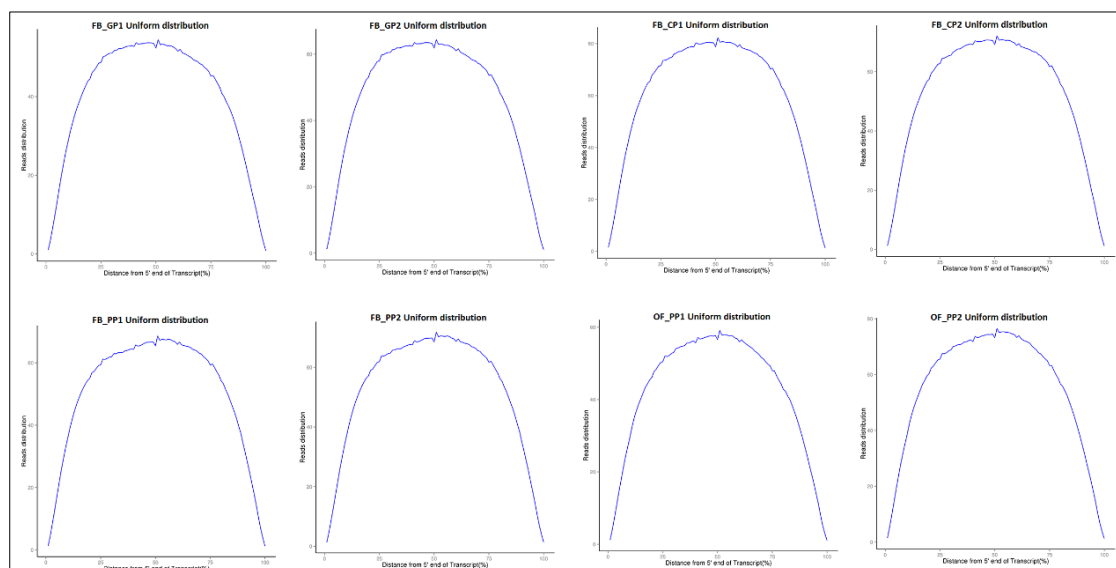

Supplementary Figure S3. Pearson correlation between two biological replicates in the four developmental stage samples.

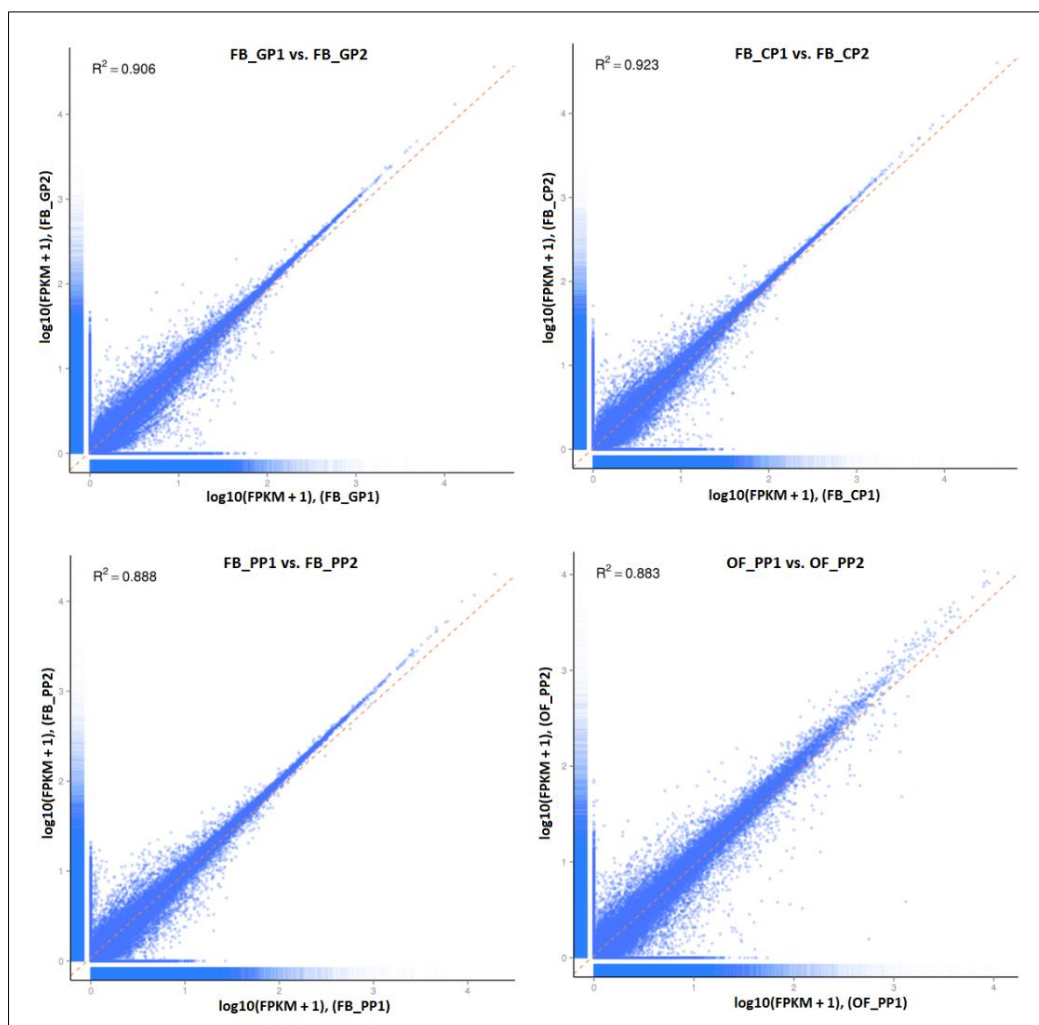

Supplementary Figure S4. Species from which the transcript annotation was derived in the Nr database.

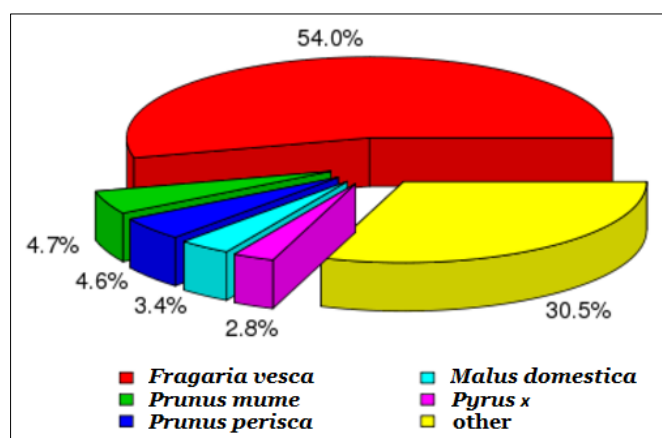

Supplementary Figure S5. GO significant enrichment analysis of up- and down-regulated differentially expressed genes in FB\_CP vs. FB\_GP, FB\_PP vs. FB\_CP and OF\_PP vs. FB\_PP.



Supplementary Figure S6. qPCR validation of transcript levels evaluated by RNA-seq. (A-C) Correlation of the fold change analysed by RNA-seq platform with data obtained using qPCR in FB\_CP vs. FB\_GP, FB\_PP vs. FB\_CP, and OF\_PP vs. FB\_PP, respectively. The information for each gene is shown in Supplementary Table S14. All qPCR data were collected from three biological replicates and there were three technical replicates for each sample. All standard errors within reasonable ranges.

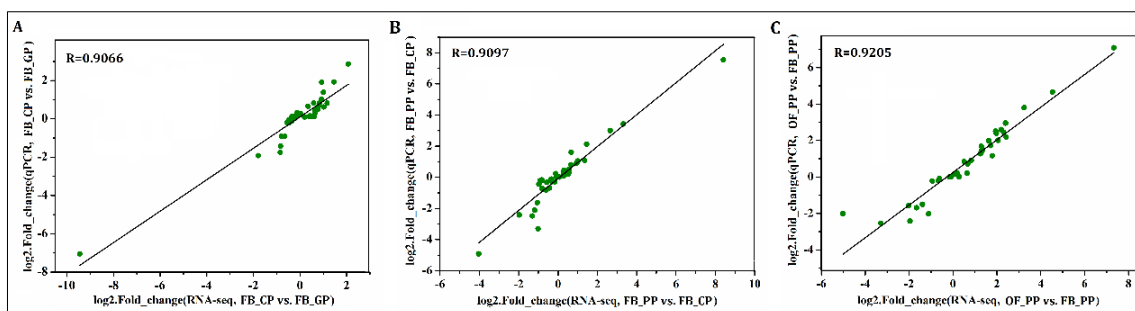

Supplementary Table S1. The quality analysis of all reads from eight samples. Error (%) represent the error rate of sequenced bases. The error rate of all samples are not more than 0.02%.

| Sample | Raw reads | Clean reads | Clean bases | Error (%) | Q20 (%) | Q30 (%) | GC (%) |
|--------|-----------|-------------|-------------|-----------|---------|---------|--------|
| FB_GP1 | 55484658  | 54644178    | 8.20Gbp     | 0.02      | 96.73   | 92.23   | 46.10  |
| FB_GP2 | 67450752  | 66371336    | 9.96Gbp     | 0.01      | 96.89   | 92.59   | 46.05  |
| FB_CP1 | 88489712  | 86996010    | 13.05Gbp    | 0.01      | 97.03   | 92.94   | 45.89  |
| FB_CP2 | 76817970  | 75621484    | 11.34Gbp    | 0.01      | 96.99   | 92.82   | 45.87  |
| FB_PP1 | 80178264  | 77216966    | 11.58Gbp    | 0.02      | 96.80   | 92.35   | 45.47  |
| FB_PP2 | 88366662  | 86011680    | 12.90Gbp    | 0.01      | 97.09   | 93.09   | 45.48  |
| OF_PP1 | 69454680  | 67793180    | 10.17Gbp    | 0.01      | 97.01   | 92.85   | 45.73  |
| OF_PP2 | 85285886  | 83457910    | 12.52Gbp    | 0.01      | 97.14   | 93.12   | 45.77  |
| Total  | 611528584 | 598112744   | 89.72Gbp    |           |         |         |        |

Supplementary Table S2. Length frequency distribution of assembly transcripts and unigenes.

| Transcript length interval | 200-500bp | 500-1Kbp | 1K-2Kbp | >2Kbp | Total  |
|----------------------------|-----------|----------|---------|-------|--------|
| Number of transcripts      | 89937     | 40130    | 41206   | 36766 | 208039 |
| Number of unigenes         | 70676     | 18686    | 12205   | 10387 | 111954 |

Supplementary Table S3. Length distribution of assembly transcripts and unigenes. N50 and N90 are defined as follows: the assembly transcripts are ordered from longest to shortest, and N50 is the length of transcripts that are no less than 50% the total length, N90 is the length of transcripts that are no less than 90% the total length.

| Assembly type | Min length | Mean length | Median length | Max length | N50  | N90 | Total nucleotides |
|---------------|------------|-------------|---------------|------------|------|-----|-------------------|
| Transcripts   | 201        | 1111        | 631           | 15940      | 1997 | 438 | 231028056         |
| Unigenes      | 201        | 751         | 360           | 15940      | 1467 | 270 | 84096145          |

Supplementary Table S4. Number of total clean reads of the eight samples mapped to reference sequences.

| Sample name | Total reads | Total mapped      |
|-------------|-------------|-------------------|
| FB_GP1      | 54644178    | 42539318 (77.85%) |
| FB_GP2      | 66371336    | 51522634 (77.63%) |
| FB_CP1      | 86996010    | 67977742 (78.14%) |
| FB_CP2      | 75621484    | 58940310 (77.94%) |
| FB_PP1      | 77216966    | 60096450 (77.83%) |
| FB_PP2      | 86011680    | 66360294 (77.15%) |
| OF_PP1      | 67793180    | 52792804 (77.87%) |
| OF_PP2      | 83457910    | 65651108(78.66%)  |

Supplementary Table S5. Success rate statistics of transcript annotation using seven databases. Nr - NCBI non-redundant protein sequences; Nt - NCBI non-redundant nucleotide sequences; KO - KEGG Ortholog database; SwissProt - A manually annotated and reviewed protein sequence database; Pfam - Protein family; GO - Gene Ontology; KOG - Clusters of Orthologous Groups of proteins.

| Annotation type                    | Number of unigenes | Percentage (%) |
|------------------------------------|--------------------|----------------|
| Annotated in Nr                    | 45138              | 40.31          |
| Annotated in Nt                    | 41005              | 36.62          |
| Annotated in KO                    | 19605              | 17.51          |
| Annotated in SwissProt             | 37690              | 33.66          |
| Annotated in Pfam                  | 35529              | 31.73          |
| Annotated in GO                    | 35830              | 32.00          |
| Annotated in KOG                   | 19897              | 17.77          |
| Annotated in at least one database | 61456              | 54.89          |
| Total unigenes                     | 111954             |                |

Supplementary Table S6. GO annotation classification frequencies.

| GO ID      | GO term                                   | GO term            | Gene number |
|------------|-------------------------------------------|--------------------|-------------|
| GO:000003  | Reproduction                              | Biological process | 240         |
| GO:0023052 | Signaling                                 | Biological process | 2601        |
| GO:0051704 | Multi-organism process                    | Biological process | 1799        |
| GO:0048519 | Negative regulation of biological process | Biological process | 281         |
| GO:0048511 | Rhythmic process                          | Biological process | 17          |
| GO:0001906 | Cell killing                              | Biological process | 29          |
| GO:0040007 | Growth                                    | Biological process | 42          |
| GO:0032502 | Developmental process                     | Biological process | 501         |
| GO:0022414 | Reproductive process                      | Biological process | 268         |
| GO:0022610 | Biological adhesion                       | Biological process | 320         |
| GO:0009987 | Cellular process                          | Biological process | 19558       |
| GO:0044699 | Single-organism process                   | Biological process | 14661       |
| GO:0040011 | Locomotion                                | Biological process | 317         |

|                       |                                                    |                    |       |
|-----------------------|----------------------------------------------------|--------------------|-------|
| GO:0044848            | Biological phase                                   | Biological process | 13    |
| GO:0065007            | Biological regulation                              | Biological process | 6564  |
| GO:0050896            | Response to stimulus                               | Biological process | 4315  |
| GO:0008152            | Metabolic process                                  | Biological process | 18860 |
| GO:0032501            | Multicellular organismal process                   | Biological process | 706   |
| GO:0050789            | Regulation of biological process                   | Biological process | 6129  |
| GO:0071840            | Cellular component organization or biogenesis      | Biological process | 3288  |
| GO:0048518            | Positive regulation of biological process          | Biological process | 340   |
| GO:0002376            | Immune system process                              | Biological process | 156   |
| GO:0051179            | Localization                                       | Biological process | 5502  |
| GO:0030054            | Cell junction                                      | Cellular component | 43    |
| GO:0005576            | Extracellular region                               | Cellular component | 701   |
| GO:0044425            | Membrane part                                      | Cellular component | 5163  |
| GO:0031012            | Extracellular matrix                               | Cellular component | 254   |
| GO:0019012            | Virion                                             | Cellular component | 852   |
| GO:0032991            | Macromolecular complex                             | Cellular component | 7399  |
| GO:0016020            | Membrane                                           | Cellular component | 5533  |
| GO:0044464            | Cell part                                          | Cellular component | 11078 |
| GO:0044423            | Virion part                                        | Cellular component | 852   |
| GO:0043226            | Organelle                                          | Cellular component | 7354  |
| GO:0009295            | Nucleoid                                           | Cellular component | 5     |
| GO:0044420            | Extracellular matrix part                          | Cellular component | 114   |
| GO:0045202            | Synapse                                            | Cellular component | 6     |
| GO:0031974            | Membrane-enclosed lumen                            | Cellular component | 969   |
| GO:0044421            | Extracellular region part                          | Cellular component | 668   |
| GO:0005623            | Cell                                               | Cellular component | 11085 |
| GO:0044456            | Synapse part                                       | Cellular component | 6     |
| GO:0044422            | Organelle part                                     | Cellular component | 3975  |
| GO:0005215            | Transporter activity                               | Molecular function | 2387  |
| GO:0030234            | Enzyme regulator activity                          | Molecular function | 615   |
| GO:0004872            | Receptor activity                                  | Molecular function | 355   |
| GO:0005198            | Structural molecule activity                       | Molecular function | 1326  |
| GO:0005488            | Binding                                            | Molecular function | 20313 |
| GO:0000988            | Protein binding transcription factor activity      | Molecular function | 332   |
| GO:0060089            | Molecular transducer activity                      | Molecular function | 615   |
| GO:0001071            | Nucleic acid binding transcription factor activity | Molecular function | 1017  |
| GO:0030545            | Receptor regulator activity                        | Molecular function | 21    |
| GO:0016530            | Metallochaperone activity                          | Molecular function | 13    |
| GO:0003824            | Catalytic activity                                 | Molecular function | 15753 |
| GO:0016209            | Antioxidant activity                               | Molecular function | 199   |
| GO:0005085            | Guanyl-nucleotide exchange factor activity         | Molecular function | 49    |
| GO:0016247            | Channel regulator activity                         | Molecular function | 146   |
| Total annotated genes |                                                    |                    | 35830 |

Supplementary Table S7. KOG annotation classification frequencies.

| <b>KOG term</b>                                               | <b>Gene number</b> |
|---------------------------------------------------------------|--------------------|
| RNA processing and modification                               | 1072               |
| Chromatin structure and dynamics                              | 340                |
| Energy production and conversion                              | 1087               |
| Cell cycle control, cell division, chromosome partitioning    | 566                |
| Amino acid transport and metabolism                           | 847                |
| Nucleotide transport and metabolism                           | 267                |
| Carbohydrate transport and metabolism                         | 932                |
| Coenzyme transport and metabolism                             | 211                |
| Lipid transport and metabolism                                | 823                |
| Translation, ribosomal structure and biogenesis               | 1751               |
| Transcription                                                 | 1016               |
| Replication, recombination and repair                         | 461                |
| Cell wall/membrane/envelope biogenesis                        | 200                |
| Cell motility                                                 | 20                 |
| Posttranslational modification, protein turnover, chaperones  | 2670               |
| Inorganic ion transport and metabolism                        | 579                |
| Secondary metabolites biosynthesis, transport and catabolism  | 756                |
| General function prediction only                              | 3389               |
| Function unknown                                              | 737                |
| Signal transduction mechanisms                                | 2090               |
| Intracellular trafficking, secretion, and vesicular transport | 1200               |
| Defense mechanisms                                            | 161                |
| Extracellular structures                                      | 128                |
| Unnamed protein                                               | 3                  |
| Nuclear structure                                             | 113                |
| Cytoskeleton                                                  | 928                |
| Total annotated genes                                         | 19897              |

Supplementary Table S8. KO annotation classification frequencies.

| <b>KO pathway hierarchy1</b>         | <b>Pathway hierarchy2</b>           | <b>Gene number</b> |
|--------------------------------------|-------------------------------------|--------------------|
| Cellular processes                   | Cell growth and death               | 751                |
| Cellular processes                   | Cell motility                       | 317                |
| Cellular processes                   | Cellular community                  | 696                |
| Cellular processes                   | Transport and catabolism            | 1224               |
| Environmental information processing | Membrane transport                  | 119                |
| Environmental information processing | Signal transduction                 | 2229               |
| Environmental information processing | Signaling molecules and interaction | 208                |
| Genetic information processing       | Folding, sorting and degradation    | 1557               |
| Genetic information processing       | Replication and repair              | 313                |
| Genetic information processing       | Transcription                       | 804                |
| Genetic information processing       | Translation                         | 2040               |
| Metabolism                           | Amino acid metabolism               | 1082               |



|                       |                                             |       |
|-----------------------|---------------------------------------------|-------|
| Metabolism            | Biosynthesis of other secondary metabolites | 345   |
| Metabolism            | Carbohydrate metabolism                     | 1605  |
| Metabolism            | Energy metabolism                           | 1321  |
| Metabolism            | Glycan biosynthesis and metabolism          | 304   |
| Metabolism            | Lipid metabolism                            | 799   |
| Metabolism            | Metabolism of cofactors and vitamins        | 472   |
| Metabolism            | Metabolism of other amino acids             | 465   |
| Metabolism            | Metabolism of terpenoids and polyketides    | 290   |
| Metabolism            | Nucleotide metabolism                       | 490   |
| Metabolism            | Overview                                    | 1175  |
| Metabolism            | Xenobiotics biodegradation and metabolism   | 246   |
| Organismal systems    | Circulatory system                          | 447   |
| Organismal systems    | Development                                 | 211   |
| Organismal systems    | Digestive system                            | 408   |
| Organismal systems    | Endocrine system                            | 1124  |
| Organismal systems    | Environmental adaptation                    | 580   |
| Organismal systems    | Excretory system                            | 312   |
| Organismal systems    | Immune system                               | 879   |
| Organismal systems    | Nervous system                              | 711   |
| Organismal systems    | Sensory system                              | 149   |
| Total annotated genes |                                             | 19605 |

Supplementary Table S9. FPKM (fragments per kilobase of transcript per million base pairs sequenced) of the four developmental stage samples (FB\_GP, FB\_CP, FB\_PP, OF\_PP).

In the individual excel format “Supplementary Table S9”.

Supplementary Table S10. Up- and down-regulated DEGs in the transcriptomic comparisons of FB\_CP vs. FB\_GP, FB\_PP vs. FB\_CP, and OF\_PP vs. FB\_PP. Gene ID is the sub-component serial number spliced by Trinity,  $p_{adj}$  (the adjusted  $p$  value) < 0.05.

In the individual excel format “Supplementary Table S10”.

Supplementary Table S11. Differentially expressed genes of the anthocyanin and petal expansion pathways.

In the individual excel format “Supplementary Table S11”.

Supplementary Table S12. Differentially expressed genes of the phytohormone biosynthesis and signalling pathways.

In the individual excel format “Supplementary Table S12”.

Supplementary Table S13. Transcription factors with  $\geq$  five-fold change in expression during rose petal development.

In the individual excel format “Supplementary Table S13”.

Supplementary Table S14. Upper and lower primer sequences of genes evaluated using qPCR experiments.

| Gene ID         | Upper primers           | Lower primers           |
|-----------------|-------------------------|-------------------------|
| PAL c45933_g1   | TAACGGAGAGACCCTAACCC    | AGAAGCCATACCAGACCCA     |
| PAL c45930_g1   | TGAGGCATTTGGAGGAGAA     | CCCTTTCAACCACCATAAGC    |
| 4CL c27001_g1   | TTCGTCAGGGACTACTGGTG    | GTGAAACAATGGCAGAACAGAT  |
| 4CL c44050_g1   | TTTGAGATTGGGACGCTTT     | CGCCACCATAGGATTCTTC     |
| 4CL c44050_g2   | GCAGGTTGACGGAGAGAATC    | CCACATAGCAAGACCGAGTTC   |
| 4CL c44050_g3   | TCCACATCTACTCCCTCAACTC  | TCCACCAACTCCAACAACCTT   |
| 4CL c39562_g1   | TGTGCTCTTCCCTTCTCGT     | TTCCTATCATTCTGGCGTTAC   |
| C4H c39153_g1   | TAATGGGTCTCTTCGTCGC     | TGTCAGATTGCGGTGGTT      |
| CHS c40105_g3   | TGCTACGGATTGCTAAAGACG   | TGGCTGTCACAAGGTTGCT     |
| F3H c44596_g1   | TCGTCTCCAGCCATTACAG     | GGTCACATCTCTCCATCCCT    |
| ANS c38343_g1   | TAGAAGAAGGGAGGCTGGAG    | GTGGAGGATGAAGGTGAGTG    |
| LAR c42630_g2   | CTTCTATTGCCTCTGCTGCTAA  | CGCCTCTGTCTTTGAACGA     |
| FLS c37896_g1   | AAGCCACACAACATCATCGT    | GCCAACCTTCTGTAACCTCTT   |
| F3'H c39849_g2  | TGGTGTGGCAGGAGTGTT      | GCTTCTTCATCTTGGACGC     |
| DFR c19467_g1   | TCAAAGACACTGGCAGAGAAAAG | CAGGCGTGAATGATGGAAG     |
| DFR c37847_g1   | TCAGGGAGACGAAACCGTAG    | AAGATGGATGGACGCACCT     |
| DFR c38644_g1   | GTGGAAGAGAACATTGAGGCTT  | CACAGGATTTGAGGAGGTCC    |
| DFR c42488_g1   | CGGAGAGTGAAGATGACTGG    | TGGACCGATTACGAGAGTTG    |
| 3GT c48997_g1   | AAATCCTCAATCATACCTCG    | TTCCATACAACCTTACTACTCCG |
| PYR c30786_g1   | GCACGGTCAGAGAAGGGTTT    | TCATCGTCCAGCAAGTCCA     |
| PYL c27077_g1   | CCATAGCCAAACCATAGACG    | TTGATGAACTGCTTGTGGG     |
| PYL c45749_g1   | TGGTCGTTAGTCAGGAGATTTG  | CCAAGAATGTGCTCGTCGT     |
| PYL c34567_g1   | ACCAGAACCAGAAGGGCAT     | TTGACGAAGTGCTTGTAGGC    |
| PP2C c43068_g1  | AAGGCACACATTCAAGCAAC    | TGGACAAAACAACGACGACTAC  |
| PP2C c44063_g1  | GAGAGGGAGGCAAAGTCATAA   | GTCCTGGCTGTGAATGTAATCT  |
| PP2C c44529_g1  | CCAACAATCTTCACTACTACGCC | TCTCCTCCTTACCACCTCA     |
| PP2C c44889_g1  | CCTGTTTCGGAGTTACCTGG    | CTTCGGATGGCTGCTTTAC     |
| PP2C c45167_g1  | TGGCGGAGGAGATAGAACTT    | TCCAACCTCAGCATCAACCT    |
| PP2C c46051_g1  | TTTGCGGAAGGAGAAGAGA     | CGTCGTAAACACCGTAGAA     |
| PP2C c45180_g2  | GCAGCAGAAAGCGAATGAG     | AACGACGACGAGAACGACA     |
| SnRK2 c37054_g1 | GGACCAACAATCTCAACCAGT   | GCTGCTGTCAATGTCAAGGT    |
| SnRK2 c39827_g1 | GCAGATTTGATGGACGAGATG   | TACGGGCTAAGATTGTGGATTC  |
| SnRK2 c40929_g1 | ACCACCCAACACAGAGCAT     | CAAGCAAAGTCACCACTGAGA   |
| SnRK2 c42473_g1 | GACACCAACTCATTAGCCATT   | AAACCTTGCCTCATTCTACTA   |
| SnRK2 c45989_g3 | TCACTTCGCCATCCAAAC      | GCGGCATACTCCATAACAATAG  |
| SnRK2 c47011_g2 | TGGAAGTATGGAAGGAGG      | GATGAGATGCGTAACTGCGT    |
| ABF c41799_g1   | GAGAGAAGGCAAAGGAGAATG   | GGATGGCAGAAGTAATGTGG    |
| ABF c47050_g1   | TTGGGATTCGGGTTTCAG      | CATTAGCATTAGTGGCAGATT   |
| RcACTIN         | CAATGCTCCCGCTATGTATG    | AGGTCAAGTCGAGAATGG      |
